# Supplementary material
Source: PubMed Central journal article supplement (PMC5832933)
Supplement: 10.1194_M081877_jlr.M081877-1.pdf [file 10.1194_M081877_jlr.M081877-1.pdf]

Supplemental Figures  
Supplemental Figure S1

A

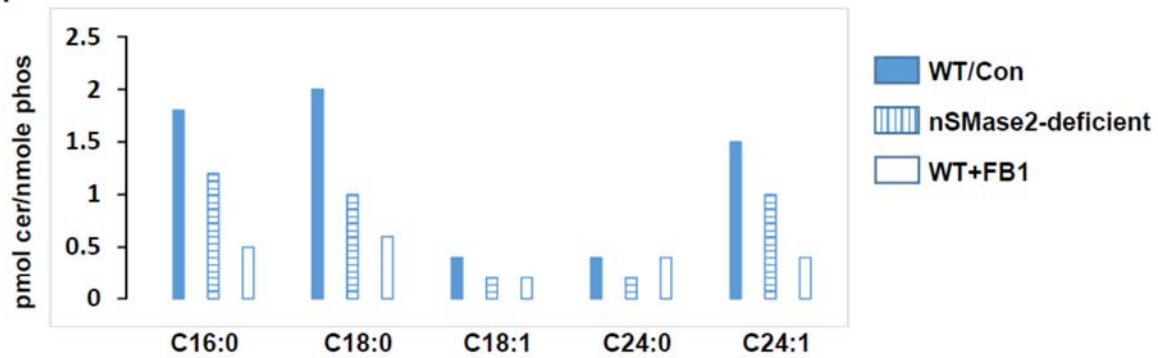

B Control (WT)

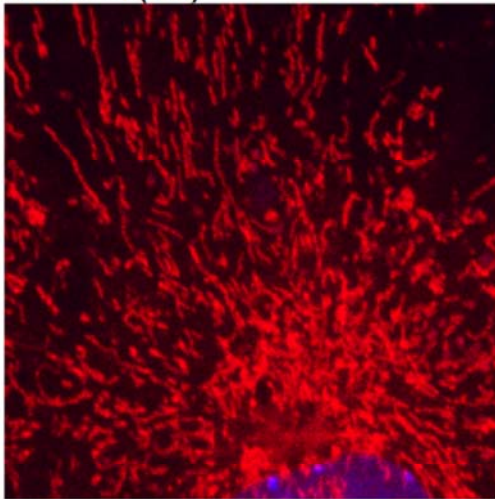

C nSMase2-deficient

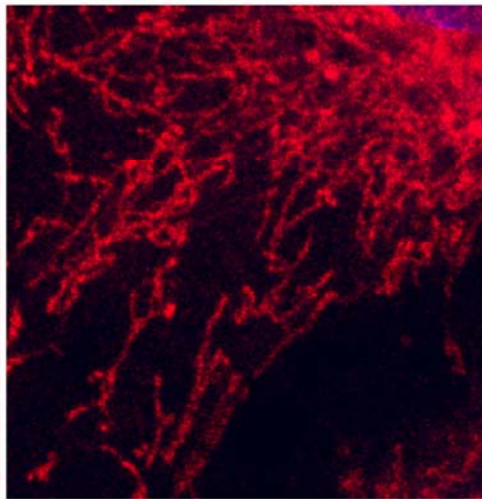

D WT+FB1

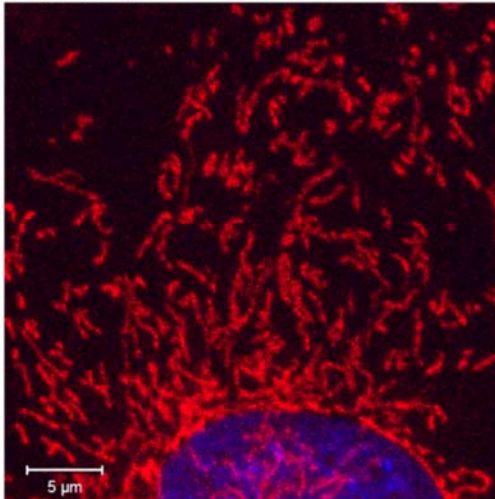

E WT+FB1+Aβ

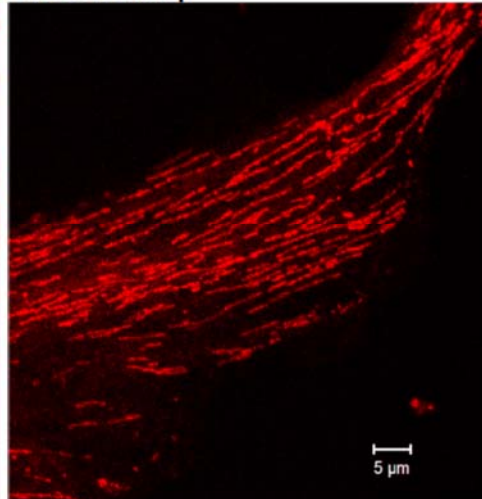

**A.** Composition of ceramides in primary cultures of astrocytes normalized to lipid phosphates (WT, wild-type; FB1, Fumonisin B1). **B-E.** Mitochondria in WT control (B), nSMase2-deficient (C), WT+FB1 (D) and WT+FB1+A $\beta$  (E) treated astrocytes. Bar = 5  $\mu$ m.

## Supplemental Figure S2

A

Wild type/Control

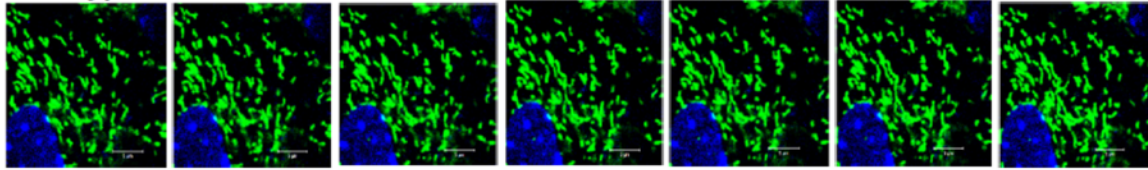

B

nSMase2-deficient

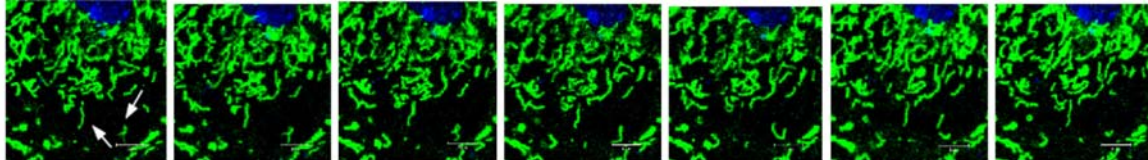

C

FB1

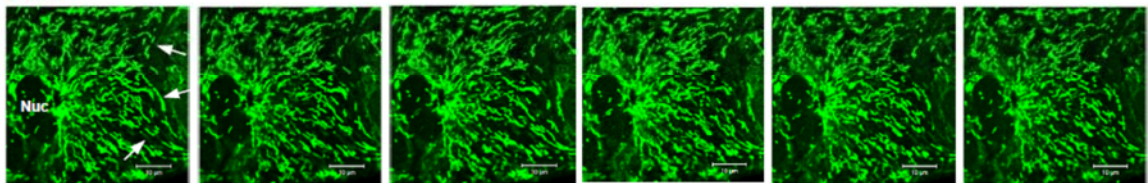

D (Con)

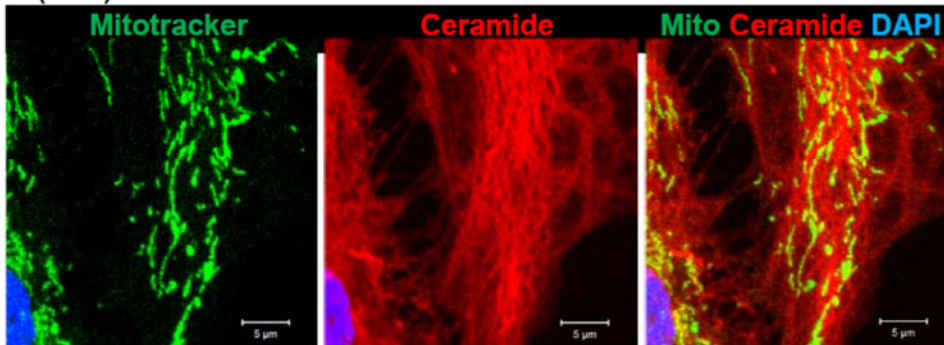

E (FB1)

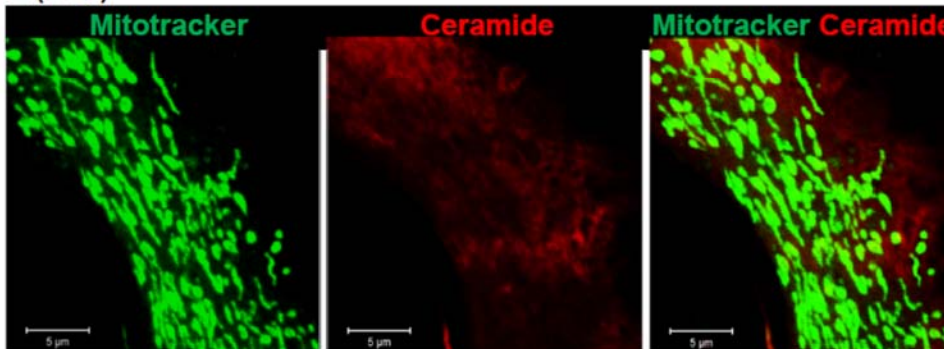

**A-C.** Real-time imaging of CytoPainter-labeled mitochondria (pseudocolored in green) in wild type (A), nSMase2-deficient (B), and FB1-treated (C) astrocytes. Arrows point at fast moving mitochondria. See also supplemental movies. **D, E.** Primary cultured astrocytes treated with FB1 (D is control) and labeled for ceramide (anti-ceramide IgG, pseudocolored in red) and mitochondria (mitotracker, pseudocolored in green).



## Supplemental Figure S3

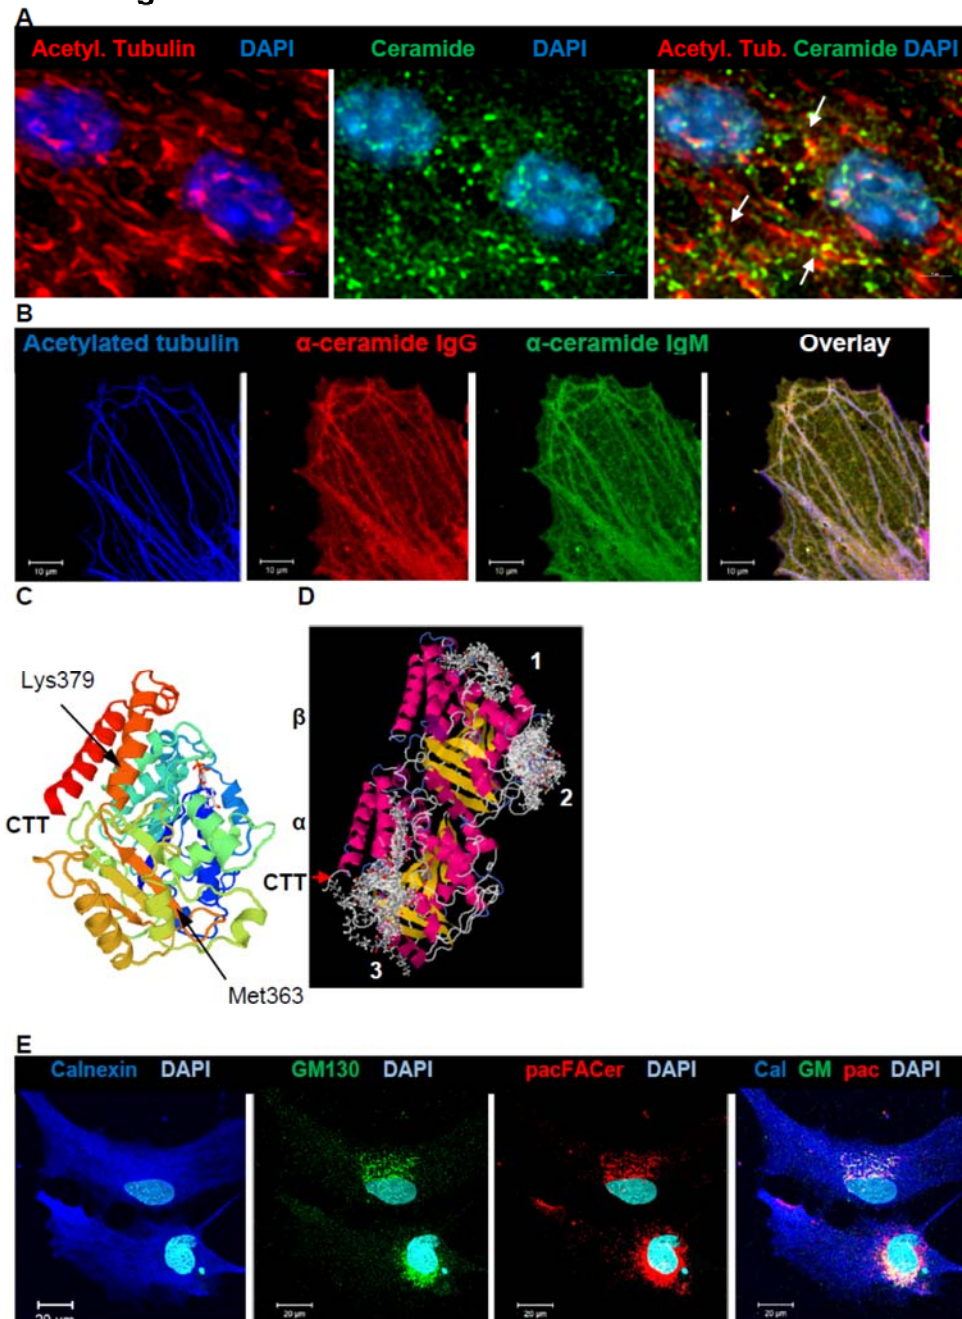

**A.** Labeling of cryosectioned WT mouse brain for acetylated tubulin (red) and ceramide (green). Arrows point at sites of colocalization. **B.** Immunocytochemistry using anti-acetylated tubulin mouse IgG (pseudocolored in blue), anti-ceramide rabbit IgG (pseudocolored in red), and anti-ceramide mouse IgM MAB0014 (pseudocolored in green). **C.** Location of pacFACer-cross-linked peptide sequence on  $\beta$ -tubulin. Beta-sheet S10 and helix 11 are colored in orange. Arrows point at amino acids flanking the cross-linked peptide. CTT, C-terminal tail. **D.** Molecular modeling using  $\alpha\beta$  tubulin dimer (ijff.pdb) as the target and C16:0 ceramide (zinc\_40164304.mol2) as the ligand in Swissdock. Image shows binding sites for association of ceramide with binding energies  $>8$  kcal/mol. **E.** Immunocytochemistry using anti-GM130 mouse IgG (pseudocolored in green) with pacFACer-labeled (pseudocolored in red) astrocytes 0 h post-fixation.

Supplemental Figure S4  
A (Control)

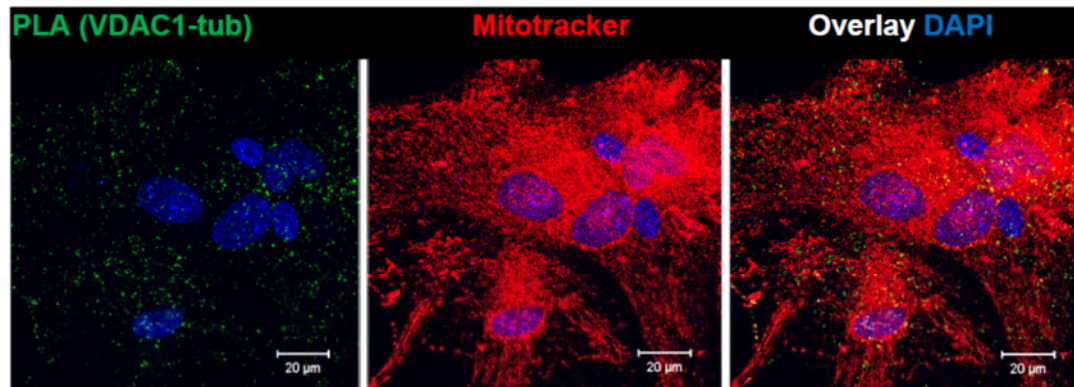

B (FB1)

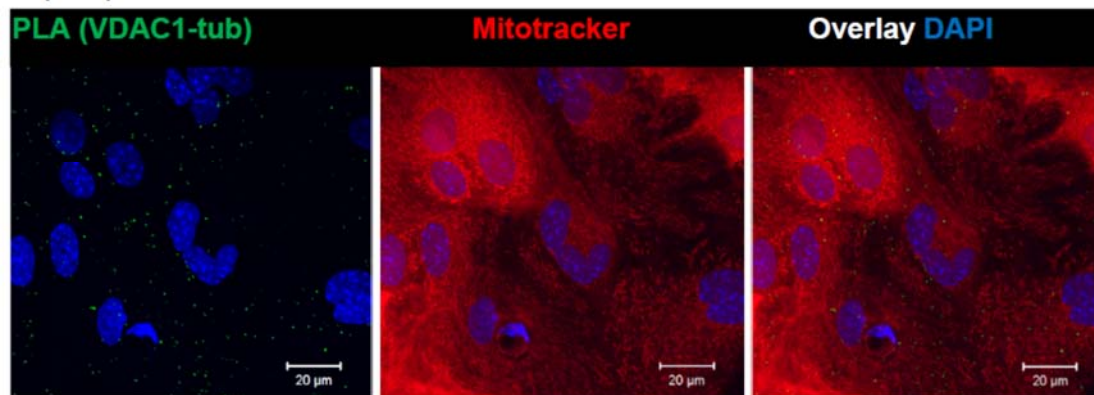

C

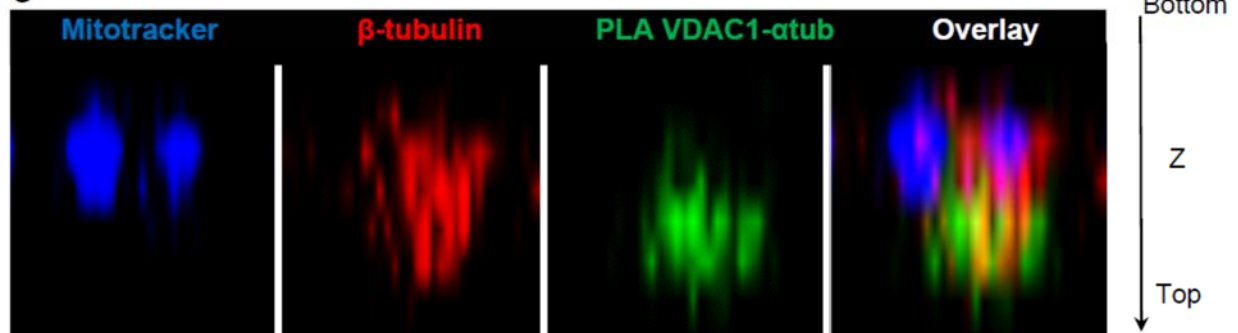

Immunocytochemistry using control (**A**) and FB1-treated (**B**, 48 h 20  $\mu$ M FB1) astrocytes and antibodies against VDAC1 (rabbit IgG) and  $\alpha$ -tubulin (mouse IgG) for PLA (pseudocolored in green). Mitochondria are labeled with mitotracker (pseudocolored in red). **C**, Z-scan cross-section showing PLA for VDAC1 and  $\alpha$ -tubulin (pseudocolored in green) at mitochondria (mitotracker, pseudocolored in blue) and colocalization with  $\beta$ -tubulin (pseudocolored in red).
